# Supplementary material
Source: Royal Society of Chemistry journal article supplement (doi:10.1039/d6cc01771a)
Supplement: d6cc01771a1.pdf [file d6cc01771a1.pdf]

**Ultrafine Pt Nanoparticle Decorated NiRu-BDC Nanosheets as Bifunctional Electrocatalysts for Alkaline Hydrogen Evolution and Methanol Oxidation**

Binghao Chen, Yilun Gao, Dongyang Zhang, Jiahui Xiang and Binbin Fan\*

Shandong Key Laboratory of Renewable Membrane Materials, Collage of Materials Science and Engineering, Qingdao University, Qingdao 266071, China

E-mail: [fanbb1991@qdu.edu.cn](mailto:fanbb1991@qdu.edu.cn)

## Experimental Section

### Preparation of Pt@NiRu-BDC/NF, Pt@Ni-BDC/NF, and Ni-BDC/NF.

In a typical synthesis, 1 mmol of  $\text{Ni}(\text{NO}_3)_2 \cdot 6\text{H}_2\text{O}$  and 0.5 mmol of  $\text{H}_2\text{PtCl}_6 \cdot 6\text{H}_2\text{O}$  were dissolved in 7.5 mL of DMF.  $\text{RuCl}_3$  (0.5, 1.0, 1.5, or 2.0 mmol) was then added to the above solution. The mixture was transferred to a 25 mL stainless-steel reactor and heated at 100 °C for 7 h. After cooled to room temperature, the products were obtained and denoted as Pt@NiRu<sub>0.5</sub>-BDC/NF, Pt@NiRu<sub>1</sub>-BDC/NF, Pt@NiRu<sub>1.5</sub>-BDC/NF, and Pt@NiRu<sub>2</sub>-BDC/NF, respectively. Pt@Ni-BDC/NF was prepared by the same procedure but without  $\text{RuCl}_3$ . Ni-BDC/NF was prepared without both  $\text{H}_2\text{PtCl}_6 \cdot 6\text{H}_2\text{O}$  and  $\text{RuCl}_3$ .

### Materials Characterization

To investigate the morphology and structure of the catalysts, scanning electron microscopy (SEM), transmission electron microscopy (TEM), atomic force microscopy (AFM), and powder X-ray diffraction (XRD) were employed. SEM was performed on a JEOL JSM-7800F microscope, TEM on a JEOL 2100Plus, AFM on a Bruker Dimension Icon, and XRD on a Bruker D8 Advance. TEM samples were prepared by drop-casting ethanol dispersions of the nanocrystals onto carbon-coated copper grids. Crystal structures were analyzed by powder XRD. X-ray photoelectron spectroscopy (XPS) was carried out on a Thermo Fisher Scientific ESCALAB 250 instrument using a monochromatic Al K $\alpha$  source.

### Preparation Pt/C electrodes

For the Pt/C electrode, 10 mg of Pt/C was dispersed in 950  $\mu\text{L}$  of isopropanol and 50  $\mu\text{L}$  of Nafion solution to form a homogeneous slurry, which was then drop-cast onto nickel foam to achieve a mass loading of 2 mg  $\text{cm}^{-2}$ .

### Electrochemical measurement.

Electrochemical measurements were performed using a CHI 760E electrochemical workstation in a standard three-electrode configuration, comprising a working electrode, an Ag/AgCl (saturated KCl) reference electrode, and a platinum sheet counter electrode. For HER and MOR evaluations, the as prepared Pt@NiRu-BDC/NF, Pt@Ni-BDC/NF, and Ni-BDC/NF MOF-based electrocatalysts were directly employed

as the working electrodes. The total catalyst mass loading was uniformly maintained at 2 mg across all samples, with the Pt content determined according to the following equation:

$$m_{Pt} = \text{Catalyst Mass} \times Pt_{\text{Mass Percentage}} \quad (1)$$

The mass activity was calculated by normalizing the peak current obtained from the MOR polarization curves to the total mass of Pt loaded on the working electrode:

$$J_{\text{Mass}} = \frac{I}{m_{Pt}} \quad (2)$$

The specific Pt loadings for different samples are detailed in Table S1.

All potentials reported in this study were referenced to the reversible hydrogen electrode (RHE) using the equation:  $E_{\text{RHE}} = E_{\text{Ag/AgCl}} + 0.059\text{pH} + 0.198$ .

For the methanol oxidation reaction (MOR) in alkaline media, the overall reaction follows a six-electron transfer process:

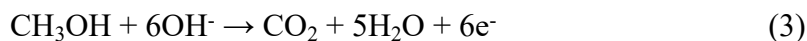

The theoretical Faradaic efficiency is defined as:

$$\text{FE} = \frac{n F n_{\text{product}}}{Q_{\text{product}}} \times 100\% \quad (4)$$

Where  $n$  is the number of electrons transferred,  $F$  is the faradic constant (96485 C/mol),  $n_{\text{product}}$  is the molar amount of the product.

The ECSA was estimated based on the electric double-layer capacitance (Cdl) method. Cyclic voltammetry (CV) was performed in a non-Faradaic potential region (0.45~0.7V) at various scan rates (20, 40, 60, 80, 100, and 120 mV s<sup>-1</sup>). The Cdl was determined plotting the capacitive current density against the scan rate, where the slope represents.

**Methanol Oxidation Reaction (MOR) Measurements:** MOR characterization was carried out in an electrolyte containing 1.0 M KOH and 1.0 M CH<sub>3</sub>OH. CV profiles were recorded at 50 mV s<sup>-1</sup>, and LSV curves were acquired at 5 mV s<sup>-1</sup> within the potential range of 0.4 to 1.2 V. Catalytic stability was evaluated by 1,000 CV cycles in the same electrolyte. CO stripping experiments were performed in 1.0 M KOH. Prior to measurement, the electrolyte was deaerated by purging with high-purity N<sub>2</sub> for 10

min, followed by electrochemical activation via 20 CV cycles at 50 mV s<sup>-1</sup>. CO was then adsorbed onto the electrode surface by bubbling CO gas into the cell at a constant potential of 0.1 V for 10 min. After CO saturation, the electrolyte was purged with N<sub>2</sub> for an additional 10 min to remove dissolved CO. Finally, CV was conducted from 0 to 1.36 V vs. RHE to obtain the CO stripping voltammograms.

**Hydrogen Evolution Reaction (HER) Measurements:** HER tests were conducted in 1.0 M KOH electrolyte. CV curves were performed at a scan rate of 50 mV s<sup>-1</sup>, and LSV curves were recorded at 5 mV s<sup>-1</sup> within a potential window of -0.17 to 0.23 V vs. RHE. All polarization curves were corrected with 95% iR compensation. Electrochemical durability was measured by chronoamperometry at the overpotential of 48 mV.

#### **In situ Raman measurements**

In this study, the potential was controlled within the range of 0.78-1.18 V vs. RHE. Raman spectra were collected over a wavenumber range of 800-3000 cm<sup>-1</sup>, with an integration time of 5 s, 5 accumulations at each potential, and a laser power set to 50%.

**Table S1.** Summary of elemental analysis obtained using EDS.

| <b>Sample</b>                      | <b>C element<br/>Wt (%)</b> | <b>O element<br/>Wt (%)</b> | <b>Pt element<br/>Wt (%)</b> | <b>Ni element<br/>Wt (%)</b> | <b>Ru<br/>element<br/>Wt (%)</b> |
|------------------------------------|-----------------------------|-----------------------------|------------------------------|------------------------------|----------------------------------|
| Pt@Ni-BDC/NF                       | 63.4                        | 25.64                       | 1.35                         | 9.61                         | 0                                |
| Pt@NiRu <sub>0.5</sub> -<br>BDC/NF | 62.71                       | 23.56                       | 0.81                         | 11.01                        | 1.91                             |
| Pt@NiRu <sub>1</sub> -<br>BDC/NF   | 61.64                       | 23.4                        | 0.83                         | 12.02                        | 2.11                             |
| Pt@NiRu <sub>1.5</sub> -<br>BDC/NF | 61.93                       | 24.86                       | 0.87                         | 9.41                         | 2.93                             |
| Pt@NiRu <sub>2</sub> -<br>BDC/NF   | 62.22                       | 24.29                       | 0.91                         | 8.85                         | 3.73                             |

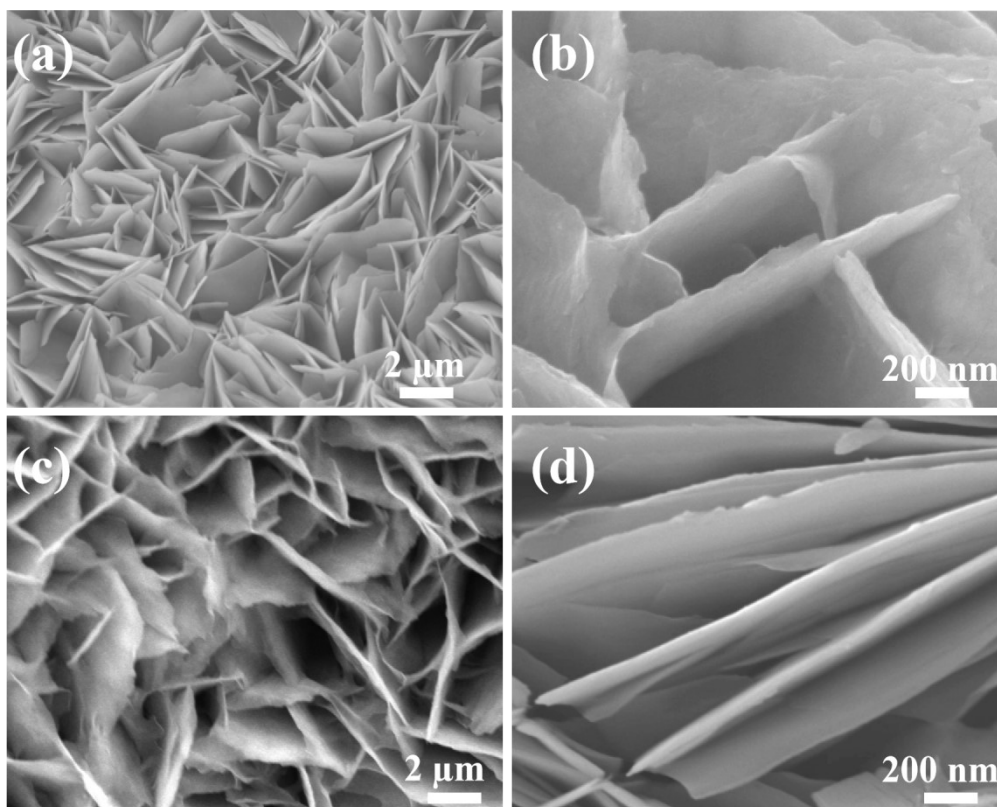

**Figure S1.** SEM images of (a, b) Ni-BDC/NF and (c, d) Pt@Ni-BDC/NF.

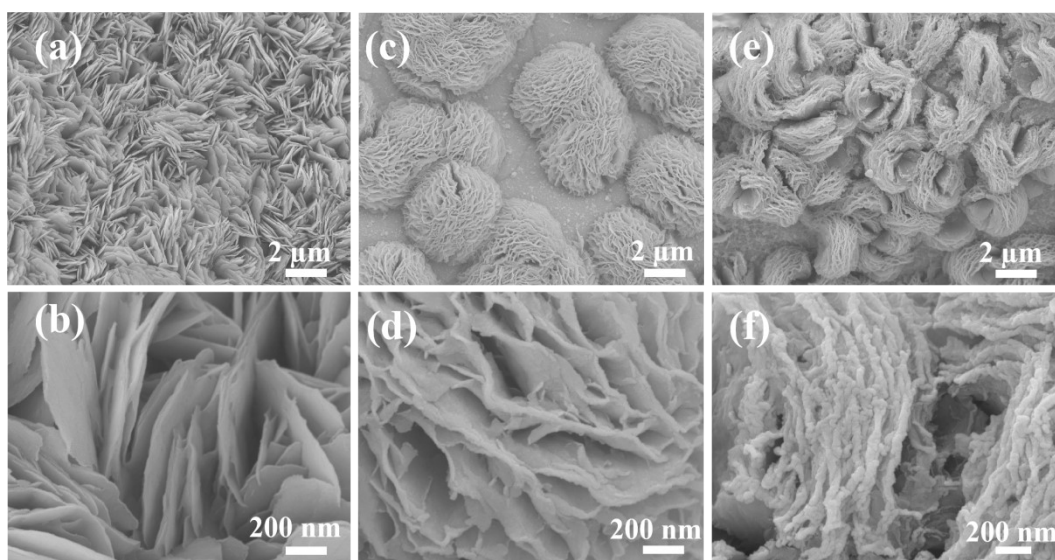

**Figure S2.** SEM images of (a, b) Pt@NiRu<sub>0.5</sub>-BDC/NF, (c, d) Pt@NiRu<sub>1.5</sub>-BDC/NF and (e, f) Pt@NiRu<sub>2</sub>-BDC/NF.

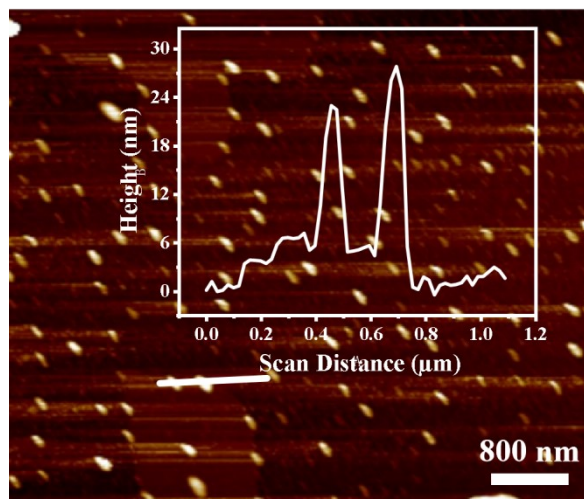

**Figure S3.** AFM image of Ni-BDC/NF (inset: thickness of nanosheets).

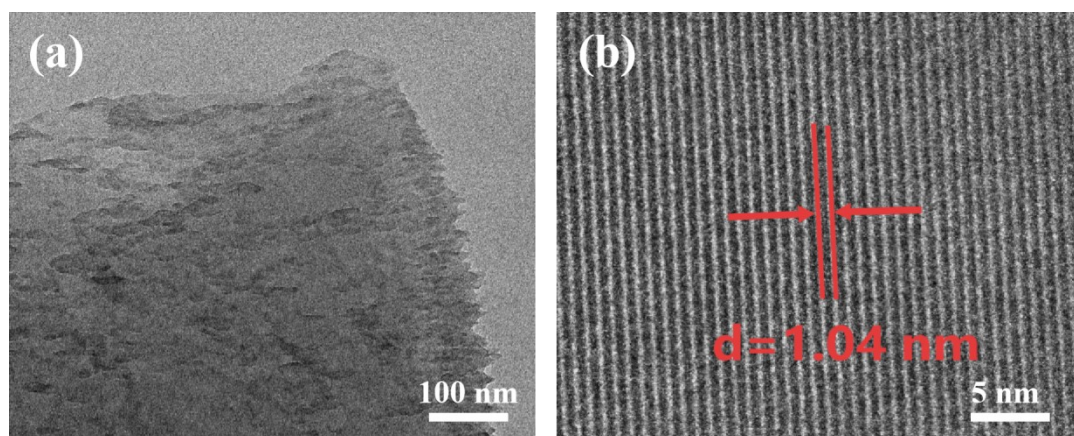

**Figure S4.** (a) TEM image of Ni-BDC/NF; (b) HRTEM image of Ni-BDC/NF.

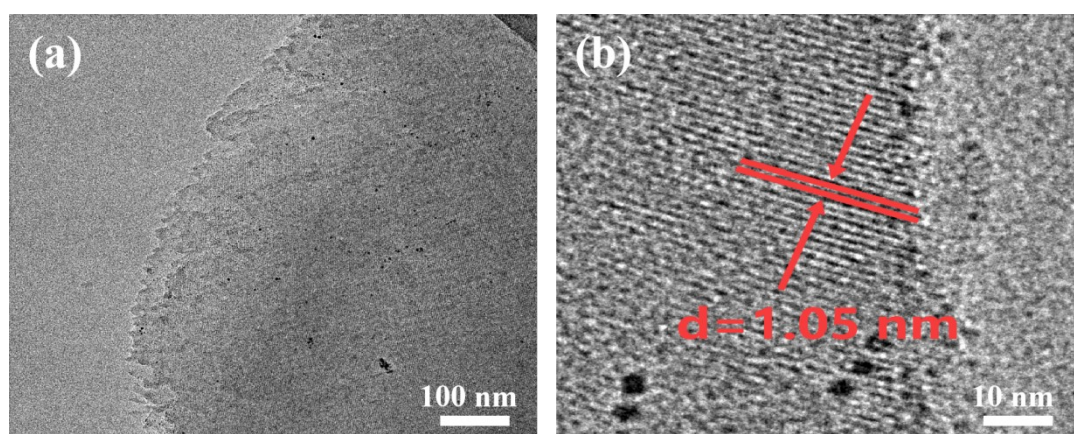

**Figure S5.** (a) TEM image of Pt@Ni-BDC/NF; (b) HRTEM image of Pt@Ni-BDC/NF.

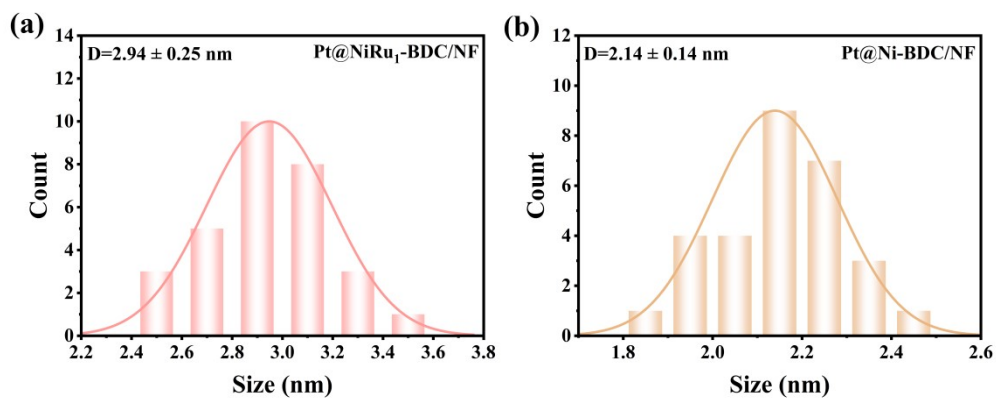

**Figure S6.** (a) Particle size distribution histogram of Pt nanoparticles in Pt@NiRu<sub>1</sub>-BDC (Obtained from the nanoparticles in Fig. 1f); (b) Particle size distribution histogram of Pt nanoparticles in Pt@Ni-BDC (Obtained from the nanoparticles in Fig. S5a).

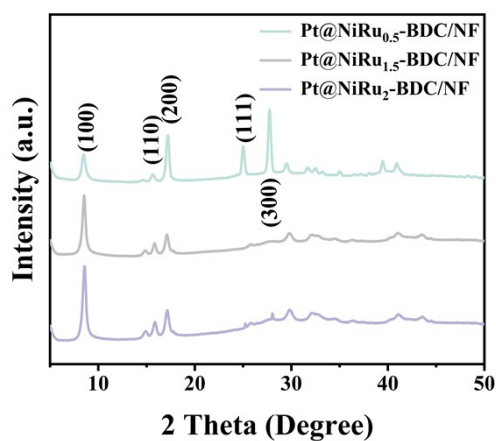

**Figure S7.** XRD patterns of Pt@NiRu<sub>0.5</sub>-BDC/NF, Pt@NiRu<sub>1.5</sub>-BDC/NF and Pt@NiRu<sub>2</sub>-BDC/NF.

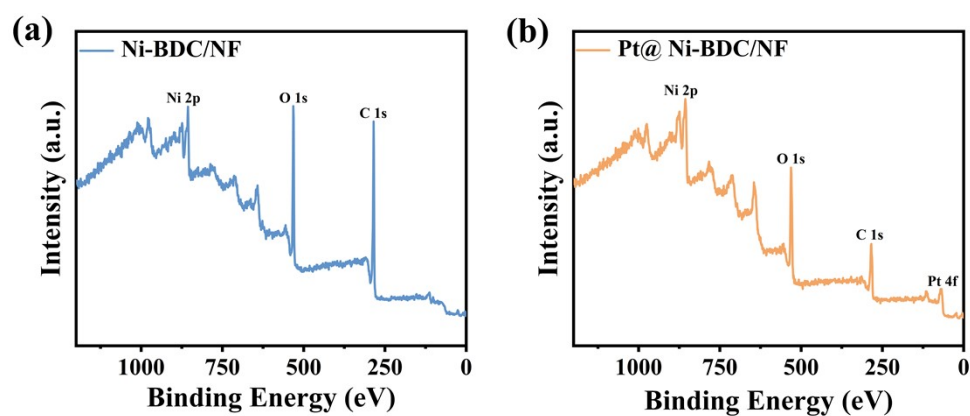

**Figure S8.** (a) The XPS survey spectra of Ni-BDC/NF; (b) The XPS survey spectra of Pt@Ni-BDC/NF.

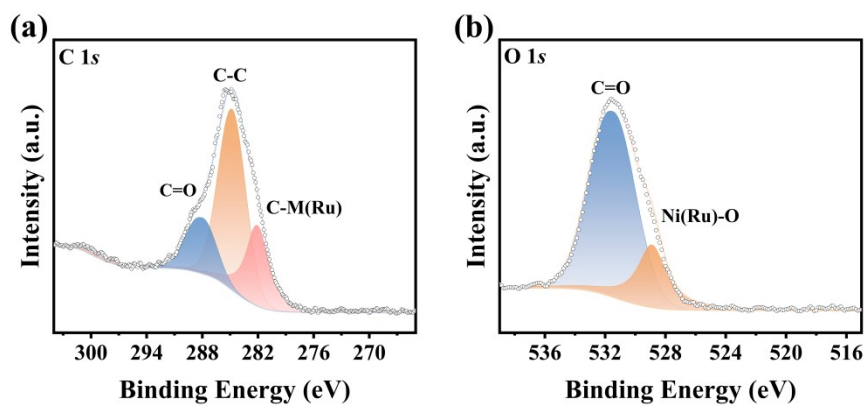

**Figure S9.** (a) High-resolution XPS spectra of C 1s for Pt@NiRu<sub>1</sub>-BDC/NF; (b) High-resolution XPS spectra of O 1s for Pt@NiRu<sub>1</sub>-BDC/NF.

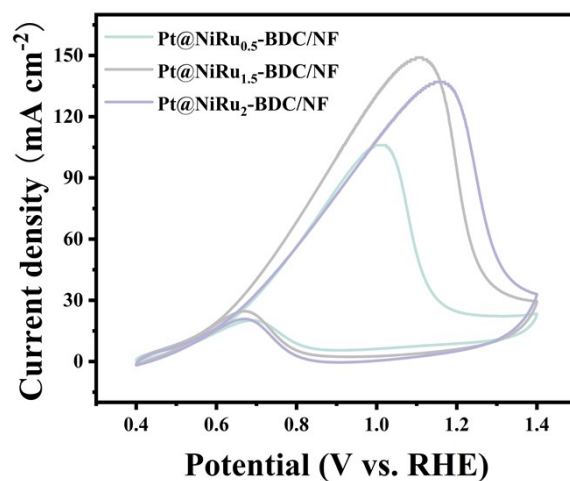

**Figure S10.** (a) CV curves of Pt@NiRu<sub>0.5</sub>-BDC/NF, Pt@NiRu<sub>1.5</sub>-BDC/NF and Pt@NiRu<sub>2</sub>-BDC/NF in 1 M KOH + 1 M CH<sub>3</sub>OH.

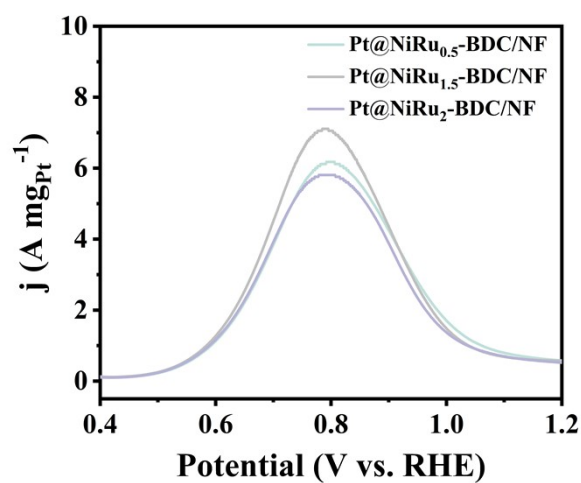

**Figure S11.** The mass activity of Pt@NiRu<sub>0.5</sub>-BDC/NF, Pt@NiRu<sub>1.5</sub>-BDC/NF and Pt@NiRu<sub>2</sub>-BDC/NF electrocatalysts.

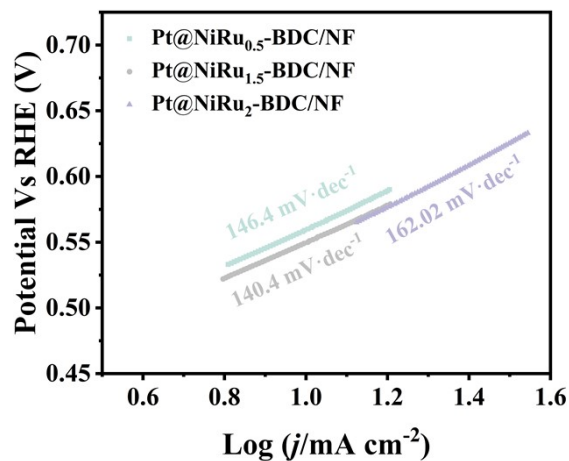

**Figure S12.** Tafel slopes of Pt@NiRu<sub>0.5</sub>-BDC/NF, Pt@NiRu<sub>1.5</sub>-BDC/NF and Pt@NiRu<sub>2</sub>-BDC/NF electrocatalysts.

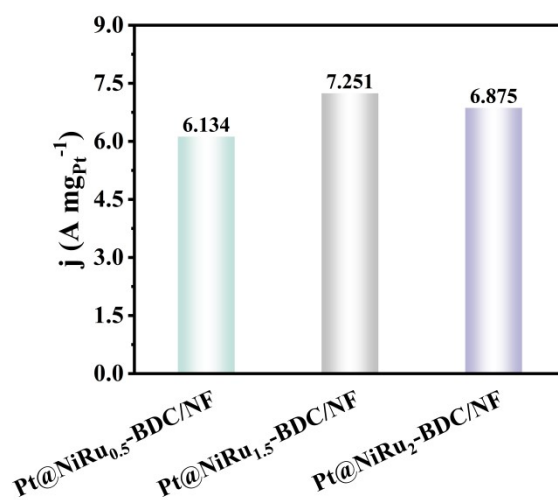

**Figure S13.** Mass activity for Pt@NiRu<sub>0.5</sub>-BDC/NF, Pt@NiRu<sub>1.5</sub>-BDC/NF and Pt@NiRu<sub>2</sub>-BDC/NF electrocatalysts.

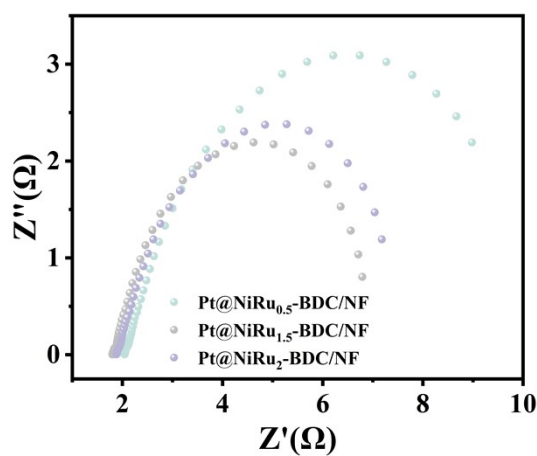

**Figure S14.** Impedance spectra of Pt@NiRu<sub>0.5</sub>-BDC/NF, Pt@NiRu<sub>1.5</sub>-BDC/NF and Pt@NiRu<sub>2</sub>-BDC/NF electrocatalysts.

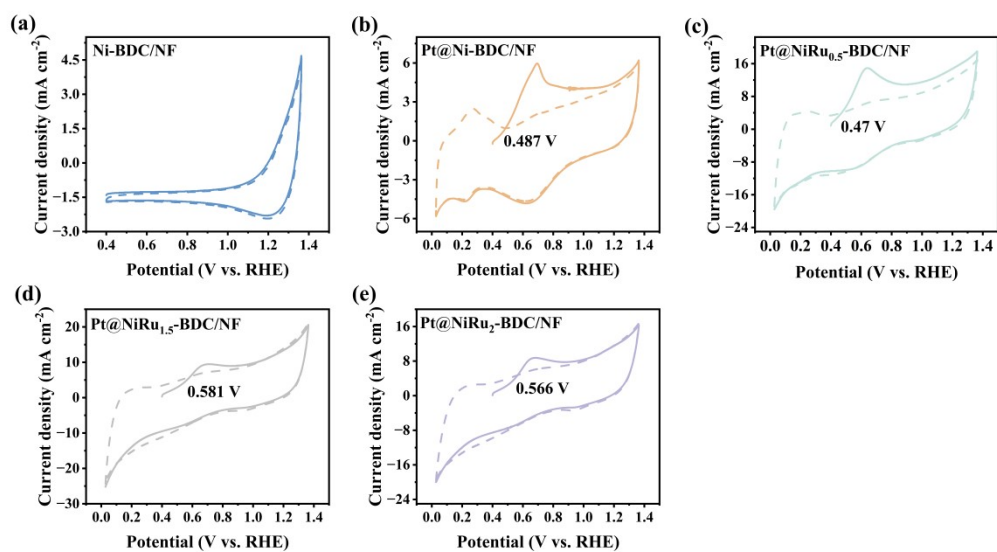

**Figure S15.** CO desorption curve of (a) Ni-BDC/NF, (b) Pt@Ni-BDC/NF, (c) Pt@NiRu<sub>0.5</sub>-BDC/NF, (d) Pt@NiRu<sub>1.5</sub>-BDC/NF and (e) Pt@NiRu<sub>2</sub>-BDC/NF.

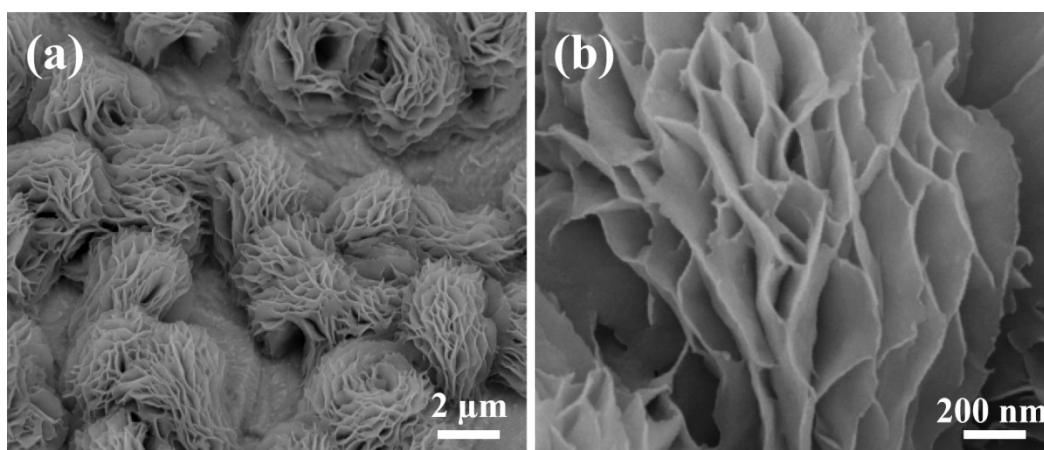

**Figure S16.** SEM images of Pt@NiRu<sub>1</sub>-BDC/NF after MOR cycling stability measurements.

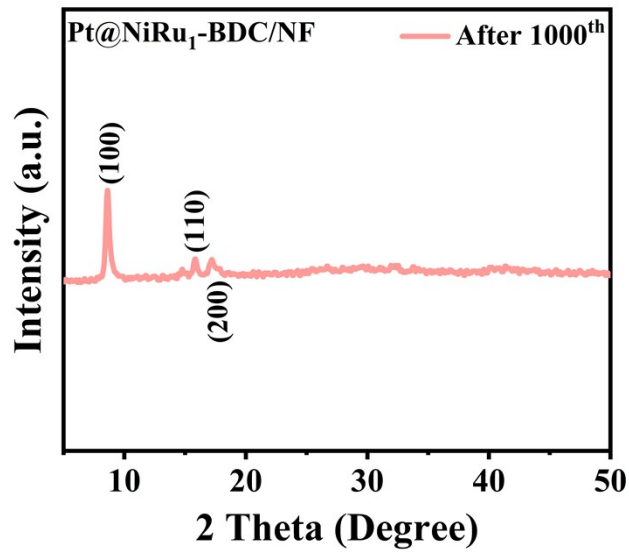

**Figure S17.** XRD patterns of Pt@NiRu<sub>1</sub>-BDC/NF after MOR cycling stability test.

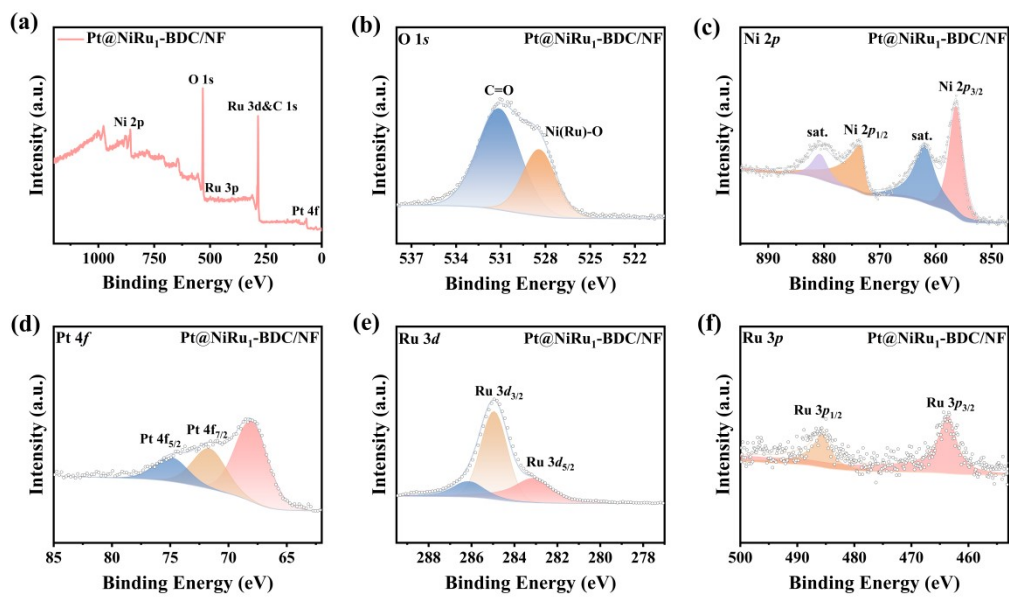

**Figure S18.** High-resolution XPS spectra of (a) XPS survey spectrum; (b) O 1s; (c) Ni 2p; (d) Pt 4f; (e) Ru 3d and (f) Ru 3p for Pt@NiRu<sub>1</sub>-BDC/NF after MOR cyclic stability test.

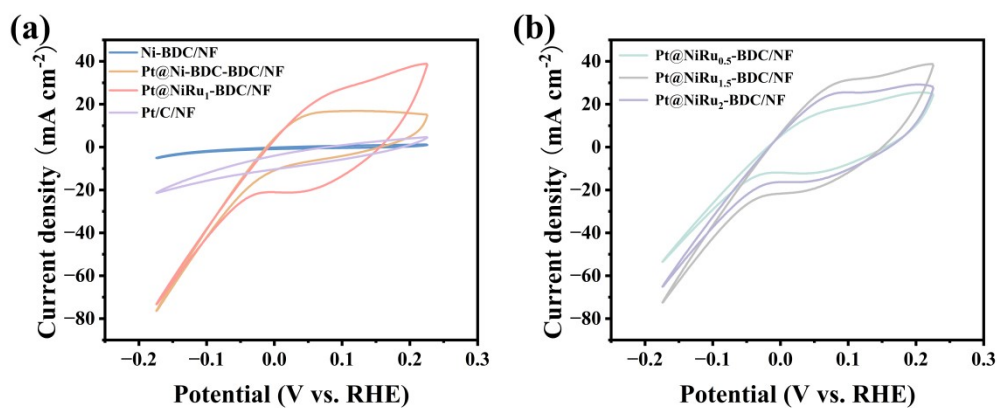

**Figure S19.** CV curves of (a) Ni-BDC/NF, Pt@Ni-BDC/NF, Pt@NiRu<sub>1</sub>-BDC/NF, and Pt/C electrocatalysts and (b) Pt@NiRu<sub>0.5</sub>-BDC/NF, Pt@NiRu<sub>1.5</sub>-BDC/NF, and Pt@NiRu<sub>2</sub>-BDC/NF.

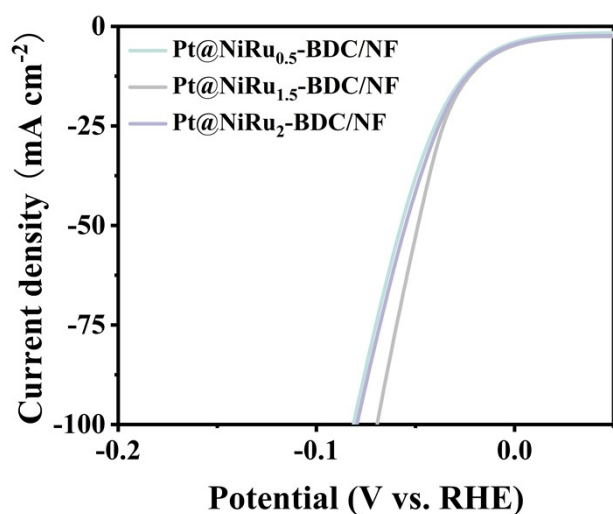

**Figure S20.** LSV curves of Pt@NiRu<sub>0.5</sub>-BDC/NF, Pt@NiRu<sub>1.5</sub>-BDC/NF and Pt@NiRu<sub>2</sub>-BDC/NF.

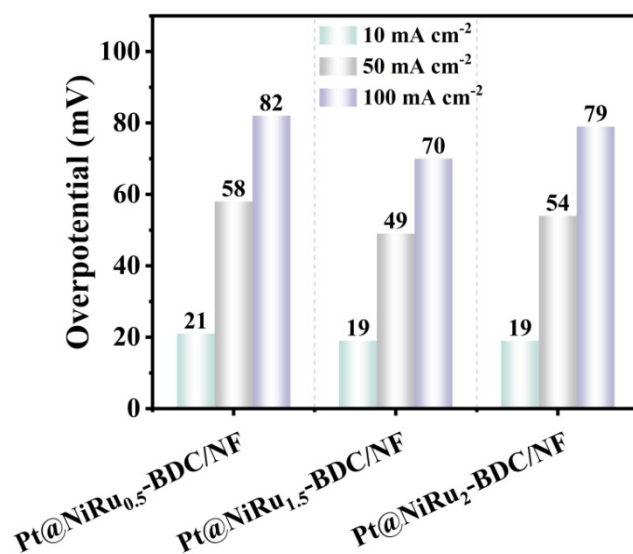

**Figure S21.** Overpotentials of Pt@NiRu<sub>0.5</sub>-BDC/NF, Pt@NiRu<sub>1.5</sub>-BDC/NF, and Pt@NiRu<sub>2</sub>-BDC/NF at the current density of 10, 50, and 100 mA cm<sup>-2</sup>.

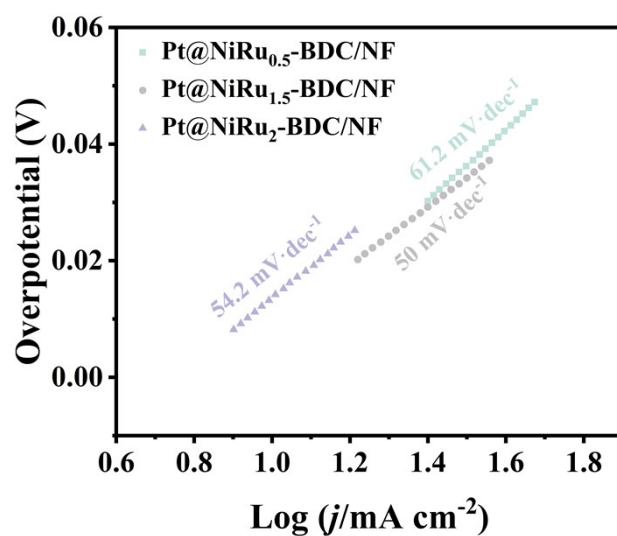

**Figure S22.** Tafel slopes of Pt@NiRu<sub>0.5</sub>-BDC/NF, Pt@NiRu<sub>1.5</sub>-BDC/NF and Pt@NiRu<sub>2</sub>-BDC/NF.

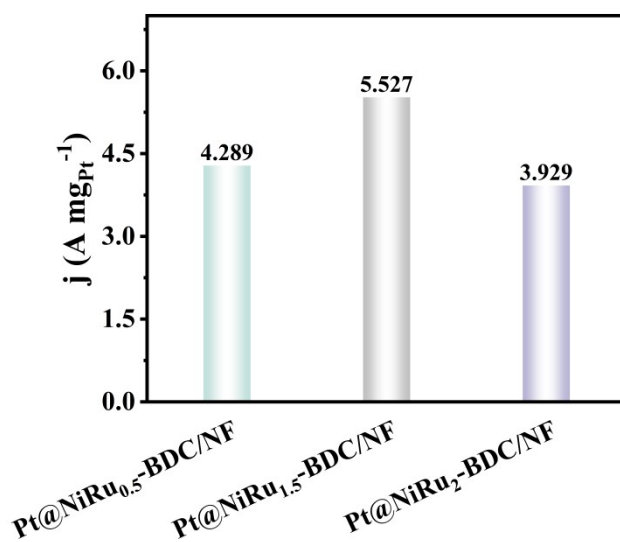

**Figure S23.** HER mass activity for Pt@NiRu<sub>0.5</sub>-BDC/NF, Pt@NiRu<sub>1.5</sub>-BDC/NF and Pt@NiRu<sub>2</sub>-BDC/NF electrocatalysts.

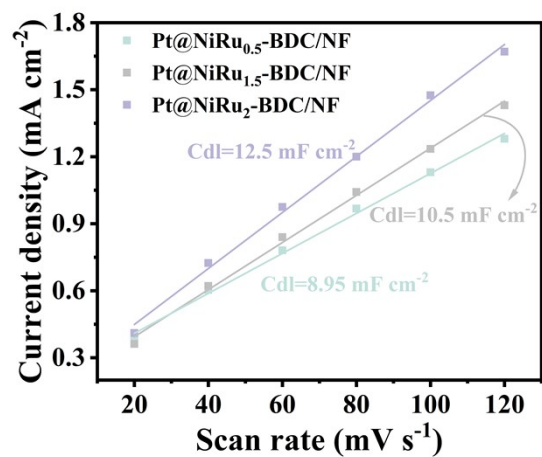

**Figure S24.** Double-layer capacitance of Pt@NiRu<sub>0.5</sub>-BDC/NF, Pt@NiRu<sub>1.5</sub>-BDC/NF, and Pt@NiRu<sub>2</sub>-BDC/NF.

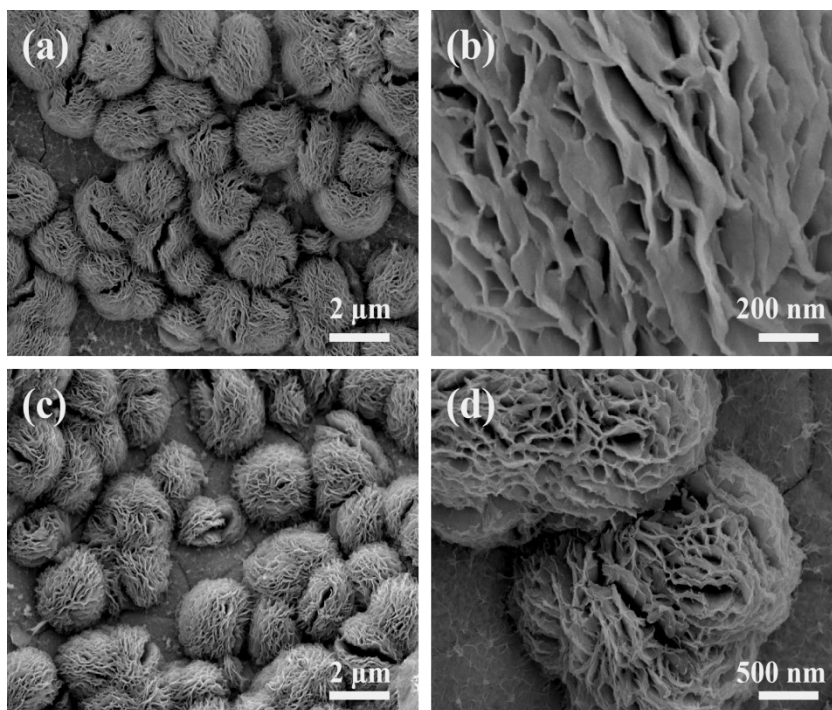

**Figure S25.** SEM images of Pt@NiRu<sub>1</sub>-BDC/NF after (a, b) 1000 CV cycles and (c, d) 10000 CV cycles.
